# Supplementary material
Source: MDPI journal article supplement (https://www.mdpi.com/2072-4292/14/24/6401)
Supplement: s1 [file s1 › remotesensing-1996844-supplementary.pdf]

# 1     **Effects of Inter- and Intra-Specific Interactions on** 2     **MooseHabitat Selection Limited by Temperature**

3     **Heng Bao <sup>1,2,†</sup>, Penghui Zhai <sup>1,2,†</sup>, Dusu Wen <sup>1,2</sup>, Weihua Zhang <sup>3</sup>, Ye Li <sup>3</sup>, Feifei Yang <sup>1,2</sup>, Xin Liang**  
4     **<sup>1,2</sup>, Fan Yang <sup>1,2</sup>, Nathan J. Roberts <sup>1,2</sup>, Yanchun Xu <sup>1,2</sup> and Guangshun Jiang <sup>1,2,\*</sup>**

5  
6     <sup>1</sup>     Feline Research Center of National Forestry and Grassland Administration, College of  
7     Wildlife and Protected Area, Northeast Forestry University, Harbin 150040, China;

8     <sup>2</sup>     Research Center for Northeast Asia Biodiversity Conservation, Harbin 150040, China

9     <sup>3</sup>     Inner Mongolia Hanma National Nature Reserve, Genhe 022359, China;

10  
11     \*     Correspondence: [jiangguangshun@nefu.edu.cn](mailto:jiangguangshun@nefu.edu.cn)

12     †     These authors contributed equally to this work.

13 Table S1 | Description of main habitat factors in Hanma National Nature Reserve used in  
14 multi-scale analyses

| Habitat factors                                | Description                                                                                | Data type  | Unit       |
|------------------------------------------------|--------------------------------------------------------------------------------------------|------------|------------|
| Elevation                                      | The average of elevation at each scale                                                     | Continuous | m          |
| Slope                                          | The average of slope at each scale                                                         | Continuous | Degree     |
| Aspect                                         | The average of aspect at each scale                                                        | Continuous | Degree     |
| Canopy density                                 | The average value of canopy density at each scale                                          | Continuous | Proportion |
| Distance to larch ( <i>Larix</i> spp.) forest  | Distance to larch forest from camera points at each scale                                  | Continuous | m          |
| Distance to birch ( <i>Betula</i> spp.) forest | Distance to birch forest from camera points at each scale                                  | Continuous | m          |
| Distance to mixed forest                       | Distance to mixed forest from camera points at each scale                                  | Continuous | m          |
| Distance to shrub swamp                        | Distance to shrub swamp from camera points at each scale                                   | Continuous | m          |
| Distance to forest swamp                       | Distance to forest swamp from camera points at each scale                                  | Continuous | m          |
| Distance to river                              | Distance to river from camera points at each scale                                         | Continuous | m          |
| Distance to road                               | Distance to road from camera points at each scale                                          | Continuous | m          |
| Amount of fallen logs                          | Amount of fallen logs at each scale                                                        | Continuous | Number     |
| Abundance of <i>Betula exilis</i> shrub        | Average height multiplied by average coverage of <i>Betula exilis</i> at each scale        | Continuous | -          |
| Abundance of <i>Rhododendron</i> spp. shrub    | Average height multiplied by average coverage of <i>Rhododendron</i> at each scale         | Continuous | -          |
| Abundance of <i>Chosenia arbutifolia</i> shrub | Average height multiplied by average coverage of <i>Chosenia arbutifolia</i> at each scale | Continuous | -          |
| Herb coverage                                  | Herb coverage at each scale                                                                | Continuous | Proportion |

15

16 Table S2 | Optimal scale of habitat variables influencing moose occurrence, and respective  
 17 parameter values, determined by generalized linear model (GLM) prediction

| Habitat factors                                          | Optimal scale (m) | Coff. | SE   | Z value | <i>p</i>      | AICc (Min) |
|----------------------------------------------------------|-------------------|-------|------|---------|---------------|------------|
| Elevation                                                | 800               | -0.01 | 0.00 | -9.42   | < <b>0.01</b> | 385.56     |
| Slope                                                    | 400               | -0.27 | 0.04 | -6.46   | < <b>0.01</b> | 464.56     |
| Aspect                                                   | 200               | 0.00  | 0.00 | 2.34    | < <b>0.05</b> | 480.23     |
| Canopy density                                           | 3200              | -1.73 | 0.35 | -4.90   | < <b>0.01</b> | 486.76     |
| Distance to road                                         | 200               | -0.00 | 0.00 | -4.74   | < <b>0.01</b> | 485.33     |
| Distance to river                                        | 800               | -0.00 | 0.00 | -6.28   | < <b>0.01</b> | 456.25     |
| Distance to birch forest                                 | 3200              | -0.00 | 0.00 | -2.30   | < <b>0.05</b> | 502.93     |
| Herb coverage                                            | 3200              | -1.35 | 0.30 | -4.54   | < <b>0.01</b> | 491.02     |
| Abundance of <i>Betula</i><br><i>exilis</i> shrub        | 3200              | 0.56  | 0.12 | 4.81    | < <b>0.01</b> | 487.01     |
| Distance to larch forest                                 | 800               | 0.00  | 0.00 | 2.20    | < <b>0.05</b> | 506.99     |
| Amount of fallen log                                     | 3200              | -0.48 | 0.13 | -3.61   | < <b>0.01</b> | 477.81     |
| Distance to shrub swamp                                  | 3200              | 0.00  | 0.00 | 0.69    | > 0.05        | 508.28     |
| Abundance of <i>Chosenia</i><br><i>arbutifolia</i> shrub | 400               | -0.67 | 0.12 | -5.44   | < <b>0.01</b> | 476.11     |
| Abundance of<br><i>Rhododendron</i> shrub                | 800               | 0.71  | 0.19 | 3.85    | < <b>0.01</b> | 499.26     |
| Distance to forest swamp                                 | 3200              | -0.00 | 0.00 | -2.97   | < <b>0.01</b> | 494.31     |
| Distance to mixed forest                                 | 800               | -0.00 | 0.00 | -3.52   | < <b>0.01</b> | 495.12     |

18

19 Table S3 | Optimal scale of habitat variables influencing roe deer occurrence, and respective  
 20 parameter values, determined by generalized linear model (GLM) prediction

| Habitat factors                                          | Optimal scale(m) | Coef. | SE   | Z value | <i>p</i>      | AICc (Min) |
|----------------------------------------------------------|------------------|-------|------|---------|---------------|------------|
| Elevation                                                | 3200             | -0.00 | 0.00 | -5.82   | < <b>0.01</b> | 731.77     |
| Slope                                                    | 200              | 0.05  | 0.01 | 3.98    | < <b>0.01</b> | 759.92     |
| Aspect                                                   | 200              | 0.00  | 0.00 | 2.51    | < <b>0.01</b> | 740.84     |
| Canopy density                                           | 3200             | -0.33 | 0.25 | -1.32   | > 0.05        | 766.94     |
| Distance to road                                         | 3200             | -0.00 | 0.00 | -3.60   | < <b>0.01</b> | 755.15     |
| Distance to river                                        | 3200             | -0.00 | 0.00 | -2.84   | < <b>0.01</b> | 760.29     |
| Distance to birch forest                                 | 200              | -0.00 | 0.00 | -4.15   | < <b>0.01</b> | 755.29     |
| Herb coverage                                            | 3200             | -0.01 | 0.24 | -0.06   | > <b>0.05</b> | 768.65     |
| Abundance of <i>Betula</i><br><i>exilis</i> shrub        | 1600             | -0.47 | 0.12 | -3.86   | < <b>0.01</b> | 758.72     |
| Distance to larch forest                                 | 200              | 0.00  | 0.00 | 4.63    | < <b>0.01</b> | 756.60     |
| Amount of fallen log                                     | 800              | -0.05 | 0.02 | -2.75   | < <b>0.01</b> | 766.08     |
| Distance to shrub swamp                                  | 3200             | 0.00  | 0.00 | -0.88   | > 0.05        | 767.88     |
| Abundance of <i>Chosenia</i><br><i>arbutifolia</i> shrub | 3200             | 0.08  | 0.06 | 1.45    | > 0.05        | 766.59     |
| Abundance of<br><i>Rhododendron</i> shrub                | 800              | 0.52  | 0.13 | 4.41    | < <b>0.01</b> | 761.08     |
| Distance to forest swamp                                 | 3200             | -0.00 | 0.00 | -2.53   | < <b>0.01</b> | 760.78     |
| Distance to mixed forest                                 | 200              | -0.00 | 0.00 | -2.88   | < <b>0.01</b> | 765.82     |

21

22 Table S4 | Number of model parameters (K), Akaike’s Information Criterion (AIC) scores and R<sup>2</sup>  
 23 of the most supported GLM (family = binomial) by stepwise regression for moose and roe deer  
 24 resource selection

| Species  | Multivariate optimal habitat selection model     | K | AIC    | R <sup>2</sup> |
|----------|--------------------------------------------------|---|--------|----------------|
| Moose    | Elevation + Distance to larch forest + Abundance | 4 | 357.94 | 0.77           |
|          | of <i>Betula exilis</i> shrub + Herb coverage    |   |        |                |
| Roe deer | Elevation + Slope + Distance to larch forest +   | 4 | 681.24 | 0.55           |
|          | Abundance of <i>Betula exilis</i> shrub          |   |        |                |

25

26 Table S5 | Number of model parameters (K), Akaike's Information Criterion (AIC) scores and  $R^2$   
 27 of the most supported GLM (family = binomial) by stepwise regression for female and male  
 28 moose resource selection in the snow-free and snow period.

| Model                          | Multivariate optimal habitat selection model                                                                                  | K | AIC    | $R^2$ |
|--------------------------------|-------------------------------------------------------------------------------------------------------------------------------|---|--------|-------|
| Female,<br>snow-free<br>period | Elevation + Slope + Distance to larch forest + Herb coverage                                                                  | 4 | 184.75 | 0.70  |
| Male,<br>snow-free<br>period   | Elevation + Distance to larch forest + Abundance of <i>Betula exilis</i><br>shrub + Distance to mixed forest + Canopy density | 5 | 183.76 | 0.53  |
| Female, snow<br>period         | Elevation + Aspect + Distance to larch forest + Abundance of<br><i>Betula exilis</i> shrub + Distance to mixed forest         | 5 | 104.03 | 0.37  |
| Male, snow<br>period           | Elevation + Distance to larch forest + Abundance of <i>Betula exilis</i><br>shrub + Distance to mixed forest                  | 4 | 114.44 | 0.42  |

29

30 Table S6 | Parameter values of the most parsimonious models of general linear models (GLM)  
 31 for female and male moose occurrence frequency in the snow-free and snow periods.

| Model            | Variable                                         | Coef. | SE   | Z value | p             | 95% CI       |              |
|------------------|--------------------------------------------------|-------|------|---------|---------------|--------------|--------------|
| Female ,         |                                                  |       |      |         |               |              |              |
| snow-free period | Intercept                                        | 19.87 | 3.13 | 6.34    | < <b>0.01</b> | <b>14.13</b> | <b>26.43</b> |
|                  | Elevation (800 m)                                | -0.02 | 0.00 | -5.92   | < <b>0.01</b> | <b>-0.03</b> | <b>-0.02</b> |
|                  | Slope (400 m)                                    | -0.12 | 0.06 | -1.91   | 0.06          | <b>-0.24</b> | <b>-0.00</b> |
|                  | Distance to larch forest (800 m)                 | 0.00  | 0.00 | 3.56    | < <b>0.01</b> | <b>0.00</b>  | <b>0.00</b>  |
|                  | Herb coverage (3200 m)                           | -0.64 | 0.43 | -1.48   | > 0.05        | -1.47        | 0.23         |
| Male , snow-free |                                                  |       |      |         |               |              |              |
| period           | Intercept                                        | 7.79  | 2.14 | 3.65    | < <b>0.01</b> | <b>3.84</b>  | <b>12.27</b> |
|                  | Elevation (800 m)                                | -0.01 | 0.00 | -3.23   | < <b>0.01</b> | <b>-0.01</b> | <b>-0.00</b> |
|                  | Distance to larch forest (800 m)                 | -0.00 | 0.00 | -1.46   | > 0.05        | -0.00        | 0.00         |
|                  | Distance to mixed forest (800 m)                 | -0.00 | 0.00 | -2.42   | < <b>0.01</b> | <b>-0.00</b> | <b>-0.00</b> |
|                  | Abundance of <i>Betula exilis</i> shrub (3200 m) | 0.45  | 0.21 | 2.22    | < <b>0.05</b> | <b>0.05</b>  | <b>0.86</b>  |
|                  | Canopy density (3200 m)                          | -1.89 | 0.62 | -3.04   | < <b>0.01</b> | <b>-3.11</b> | <b>-0.65</b> |
| Female, snow     |                                                  |       |      |         |               |              |              |
| period           | Intercept                                        | 10.85 | 4.41 | 2.46    | < <b>0.01</b> | <b>2.64</b>  | <b>20.12</b> |
|                  | Elevation (800 m)                                | -0.02 | 0.01 | -3.20   | < <b>0.01</b> | <b>-0.03</b> | <b>-0.01</b> |
|                  | Aspect (200 m)                                   | 0.00  | 0.00 | 1.67    | > 0.05        | -0.00        | 0.01         |
|                  | Distance to larch forest (800 m)                 | 0.00  | 0.00 | 2.47    | <b>0.01</b>   | <b>0.00</b>  | <b>0.01</b>  |
|                  | Distance to mixed forest (800 m)                 | 0.00  | 0.00 | 2.91    | <b>0.00</b>   | <b>0.00</b>  | <b>0.00</b>  |
|                  | Abundance of <i>Betula exilis</i> shrub (3200 m) | 0.59  | 0.37 | 1.57    | > 0.05        | -0.16        | 1.32         |
| Male, snow       |                                                  |       |      |         |               |              |              |
| period           | Intercept                                        | 6.18  | 3.42 | 1.80    | > 0.05        | -0.31        | 13.18        |
|                  | Elevation (800 m)                                | -0.01 | 0.00 | -2.71   | < <b>0.01</b> | <b>-0.02</b> | <b>-0.00</b> |
|                  | Distance to larch forest (800 m)                 | 0.01  | 0.00 | 4.06    | < <b>0.01</b> | <b>0.00</b>  | <b>0.01</b>  |
|                  | Distance to mixed forest (800 m)                 | 0.00  | 0.00 | 2.39    | < <b>0.05</b> | <b>0.00</b>  | <b>0.00</b>  |

---

|                                                  |      |      |      |        |      |      |
|--------------------------------------------------|------|------|------|--------|------|------|
| Abundance of <i>Betula exilis</i> shrub (3200 m) | 1.19 | 0.33 | 3.58 | < 0.01 | 0.55 | 1.87 |
|--------------------------------------------------|------|------|------|--------|------|------|

---

32
